# Supplementary material for: A novel tripodal tris-hydroxypyrimidinone sequestering agent for trivalent hard metal ions: synthesis, complexation and in vivo studies
Source: Royal Society of Chemistry journal article supplement (doi:10.1039/c2dt32361c), 2012-11-15
Supplement: c2dt32361c.pdf [file c2dt32361c.pdf]

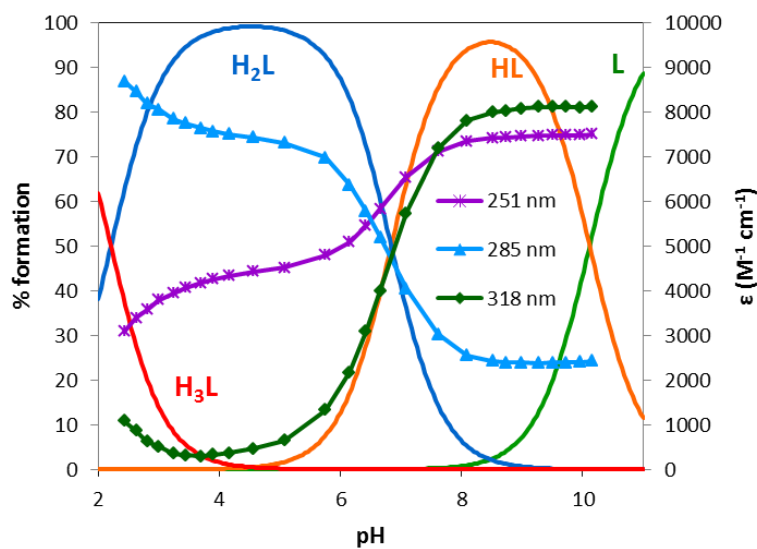

**Fig. S1.** Species distribution curves with molar extinction coefficients at maximum absorption wavelengths for HOPY-PrN ( $C_L = 1.95 \times 10^{-4}$  M).

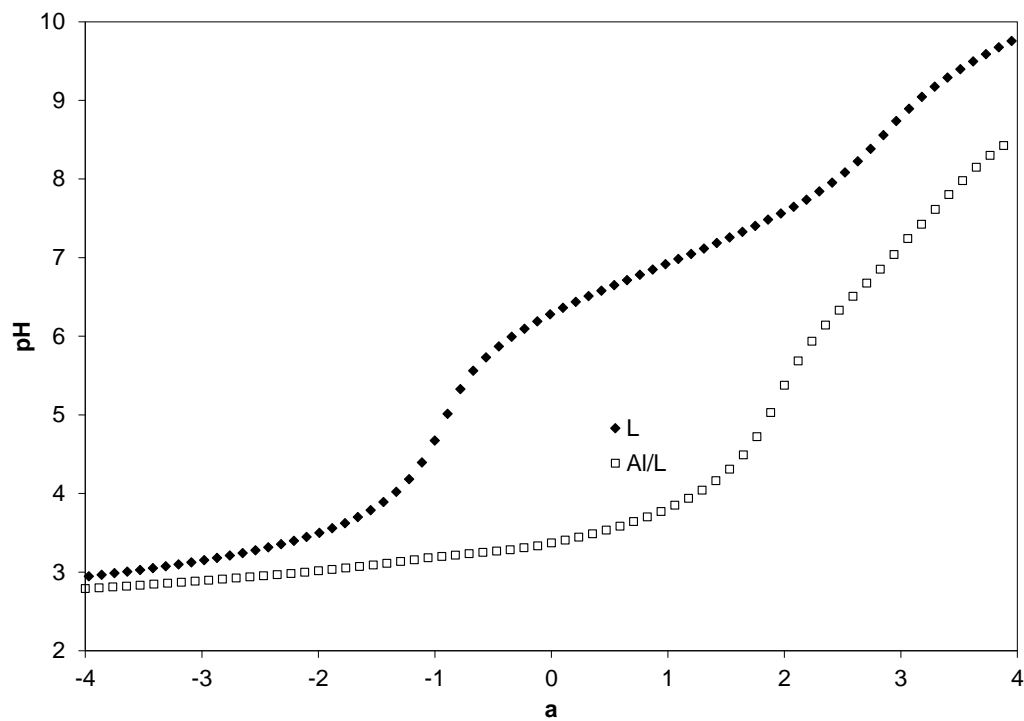

**Fig. S2.** Potentiometric titration curve for  $\text{NTP}(\text{PrHPM})_3$  and the 1:1  $\text{Al}^{3+}/\text{NTP}(\text{PrHPM})_3$  system ( $C_L = 4 \times 10^{-4}$  M);  $a$  is the number of millimoles of titrant per millimoles of ligand.
